# Supplementary material for: Long‐read sequence capture of the haemoglobin gene clusters across codfish species
Source: PubMed Central journal article supplement (PMC7379720; doi:10.1111/1755-0998.12955), 2018-12-04
Supplement: MEN-19-245-s001.pdf [file MEN-19-245-s001.pdf]

# MOLECULAR ECOLOGY RESOURCES

Supplemental Information for:

## Long-read sequence capture of the hemoglobin gene clusters across codfish species

Siv Nam Khang Hoff, Helle T. Baalsrud, Ave Tooming-Klunderud, Morten Skage, Todd Richmond, Gregor Obernosterer, Reza Shirzadi, Ole Kristian Tørresen, Kjetill S. Jakobsen and Sissel Jentoft<sup>†</sup>

### Table of Contents:

|                                                                                                                                                                                    |                                                                |
|------------------------------------------------------------------------------------------------------------------------------------------------------------------------------------|----------------------------------------------------------------|
| <b>Supplementary Material and Methods</b><br>Probe design<br>PacBio barcoding and oligo design<br>Read filtering<br><i>De novo</i> assembly<br>Mapping reads to the target regions | Page 2-5<br>Page 2-4<br>Page 4<br>Page 4<br>Page 4-5<br>Page 5 |
| <b>Supplementary Tables S1 – S8</b>                                                                                                                                                | Page 6-14                                                      |
| <b>Supplementary Figures S1 -S3</b>                                                                                                                                                | Page 15-17                                                     |
| <b>References</b>                                                                                                                                                                  | Page 18                                                        |

## Supplementary Material and Methods

### Probe design

The initial target sequences from related species were identified using blastn (Altschul 1990) using the DNA sequence of the hemoglobin clusters in *Gadus morhua* as the query sequences as following:

```
ncbi-blast-2.2.31+/bin/tblastn -query  
../Gadus_morhua_hemoglobin_proteins.fa -db MN_LA_candidates_dusted.fa  
-out Hemoglobin_hits.txt -outfmt 6 -lcase_masking -num_threads 8
```

Candidate target regions for each species were then further refined by using tblastn and the protein sequences from the *Gadus morhua* hemoglobin genes and flanking genes as following:

```
ncbi-blast-2.2.31+/bin/tblastn -query  
flanking_genes/Gadus_morhua.gadMor1.flanking_proteins.fa -db  
MN_LA_candidates_dusted.fa -out Flanking_gene_hits.txt -outfmt 6 -  
lcase_masking -num_threads 8
```

Hits from tblastn were then filtered to remove matches less than 20 amino acids in length, or with less than 65% identity. Each candidate region was then padded on each side by 10000 bases, resulting in candidate region totals as seen in Table S6.

Candidate probes of variable length, 50 to 100 nucleotides, were generated at a 5 bp step (5' start to 5' start). The length of each probe was determined by synthesis parameters, not taking into account GC content, T<sub>m</sub> or other criteria. Rather than scoring target regions for repetitiveness, each individual candidate probe was scored for repeat content. Since complete genome sequence was not available for each of the target (draft) genomes, repeat scores were generated using WGS sequence from each species. WGS sequence read pairs (2x150 bp HiSeq) for each species were adapter trimmed and quality filter trimmed, removing leading or trailing bases where the base quality score was less than 20. Overlapping read pairs were merged using FLASH 1.2.8 software ([ccb.jhu.edu/software/FLASH/](http://ccb.jhu.edu/software/FLASH/)), and then filtered by length, retaining only merged read pairs, and unmerged quality trimmed read pairs, which were at least 100 bp in length. Using those sequences, a 15-

mer histogram was created for each species using a random sampling of 4.2 Gbp of sequence, to represent 5X genome equivalents.

The repetitiveness of the probes was checked using each species histogram sequentially. The repeat score is defined as the average 15-mer frequency of the probe, determined by sliding a 15-mer window across the entire length of the probe and averaging the count of each 15-mer. For each probe, the highest repeat score across the 10 species was retained. Each probe was uniqueness checked against each of the 10 species individually, using the 5X genome equivalent reads as the “genome”, using SSAHA version 1 (<https://www.sanger.ac.uk/science/tools/ssaha>). A genome match was defined as a stretch of sequence at least 30 bp in length, allowing up to 5 mismatches, insertions or deletions. The maximum number of matches for each probe across all each species was retained as the match value. For the 9 selected species, the match total was divided by 5 to compensate for the 5X genome equivalents that were screened. By storing the highest repeat score and the highest number of matches in the candidate probe database, the candidate probes for the capture design are biased to be very conservative.

For both *Gadus morhua* and the selected subset of codfishes, only unique probes (matches  $\leq 1$ ) were selected and used a very stringent threshold for the repeat score (average 15-mer frequency less than 25), to minimize the amount of off-target fragments that would be captured. Complete target coverage was deemed to be unnecessary, given the length of fragments to be captured, hence the attempt to use unique and non-repetitive probes. Capture probes were selected at an average spacing of 35 bp (5' start to 5' start). Candidate probes were ranked by score, based on uniqueness, repetitiveness, probe T<sub>m</sub>, and base pair compositions, and the best scoring probe in each selection window (15 bp) was selected. The selection window was then advanced 20 bp and the process repeated until the end of the target sequence was reached. The average probe length is 75 bp, meaning that, on average, each base is covered by 2 capture probes. For *Gadus morhua*, 7057 probes were selected to cover the 337 kb of sequence. The selected probes cover 265 kb (78.7%) of the target directly, and 335 kb (99.4%) of the target would be estimated to be covered by captured fragments using an offset of 1000 bp. For the related species, 29774 probes were selected to cover the 1.82 Mbp of target sequence. The selected probes cover 1.27 Mbp (69.6%) of the targets directly and 1.818 (99.9%) of the target would be estimated to be covered by captured

fragments using an offset of 1000 bp. Each selected probe was represented on the final design a total of 57 times.

### **PacBio barcoding and oligo design**

The PacBio barcoding and oligo design uses the the NimbleGen SeqCap EZ kit as template, which makes it possible to utilize the adapter kit for ligation- and blocking oligos during hybridization reactions. SeqCap EZ kit Oligo1 (yellow in figure S3) is similar to the first part of the Illumina Truseq universal adapter and Oligo2 is the reverse complement of the last bases in the Truseq indexed adapter, which make up the 3' of the Pre-capture oligos in addition to the PacBio barcode at its 5' (green in figure S3). Pre-capture amplification add the PacBio barcode to the library, with unique barcodes at each end (asymmetric). The combined use of ligation indexing and PacBio barcodes is a robust cross check for sample identity (see main paper). The post capture oligos with the 3' end extending into the Illumina Truseq adapter, ensures that only fragments with a correct design are amplified (blue in Figure S3). The associated blocking oligos for the PacBio barcodes (red in Figure S3), as well as blocking reagents for the Illumina adapter region as part of the Seqcap EZ kit (HE-blocking in Figure S3), are needed for the hybridization reaction. List of oligos for pre- and post - capture amplification and associated blocking oligos for hybridization capture enclosed in Table S7.

### **Read filtering**

Reads were filtered and de-multiplexed using the 'RS\_reads of insert.1' pipeline on SMRT Portal (SMRT Analysis version smrtanalysis\_2.3.0.140936.p2.144836) using following settings: Minimum number of passes = 0, minimum accuracy = 0.8, minimum barcode score = 24. Each set of reads corresponding to a given species was crossed-checked with their respective six-nucleotide Illumina adapter.

### **De novo assembly**

We varied different options to optimize the assembly process to our data. The options yielding best results and the option that was chosen for the final assembly was the following corOutCoverage=500, corMhapSensitivity=high, corMinCoverage=0, minOverlapLength=200, and corMaxEvidenceErate=0.15.

We assembled the target regions *de novo* for each of the eight codfishes using Canu v1.4 +155 changes (r8150 c0a988b6a106c27c6f993dfe586d2336282336a6)(Berlin *et al.* 2015) varying the

following options, corOutCoverage by 500, 600, 1000, 2000, and minOverlapLength by 100, 200, and to 500. The setting corOutCoverage set to 500 and minOverlapLength set to 200 gave us the longest unitigs, while retaining maximum number of *Hb* and flanking genes in our assemblies.

Following options were used:

```
canu -p <filename> -d <dirname> genomeSize=0.3m corMhapSensitivity=high  
corOutCoverage=500 corMinCoverage=0 minOverlapLength=200  
corMaxEvidenceErate=0.15 maxThreads=5 contigFilter="2 1000 1.0 1.0 2" -  
pacbio-raw <raw_reads.fastq>
```

Furthermore, Pbjelly (English *et al.* 2012) was used with raw reads as input to fill possible gaps using the following options:

```
<jellyProtocol>  
<reference>/assembly.fasta</reference>  
<outputDir>/species</outputDir>  
<blasr>-minMatch 8 -minPctIdentity 70 -bestn 1 -nCandidates 20  
-maxScore -500 -nproc 10 -noSplitSubreads</blasr>  
<input baseDir="/raw_reads_directory/">  
<job>raw_reads.fastq</job>  
</input>  
</jellyProtocol>
```

### **Mapping reads to the target regions**

PacBio reads for all species were mapped back to the Atlantic cod reference genome, gadMor2 (Tørresen *et al.* 2017) in order to determine sequence capture success and target mapping depths. Mapping was done using BWA-mem v0.7.10 (Li & Durbin 2009) with the following options: -k17 -W40 -r10 -A2 -B5 -O2 -E1 -L0.

## Supplementary Tables

**Table S1:** For each species, the average and median depth of reads mapped against the target regions (for MN, LA and total), the genomic divergence to Atlantic cod (number of SNPs), percentage of nucleotides mapped to the target and the percentage of the target regions with more than 10x coverage.

| Species             | Average mapping depth |     |     | Median mapping depth |     |     | Genomic divergence to Atlantic cod<br>SNPs | Percentage of nucleotides mapped | Percentage of target regions covered by >10x |
|---------------------|-----------------------|-----|-----|----------------------|-----|-----|--------------------------------------------|----------------------------------|----------------------------------------------|
|                     | MN                    | LA  | Tot | MN                   | LA  | Tot |                                            |                                  |                                              |
| Atlantic cod        | 277                   | 230 | 260 | 266                  | 203 | 242 | 75369                                      | 43                               | 100                                          |
| Haddock             | 122                   | 100 | 114 | 106                  | 79  | 97  | 322534                                     | 40                               | 98                                           |
| Silvery pout        | 130                   | 161 | 142 | 73                   | 93  | 80  | 562937                                     | 27                               | 93                                           |
| Cusk                | 160                   | 128 | 149 | 126                  | 92  | 114 | 587271                                     | 34                               | 95                                           |
| Burbot              | 159                   | 136 | 150 | 148                  | 97  | 124 | 639069                                     | 36                               | 91                                           |
| European hake       | 129                   | 102 | 119 | 80                   | 37  | 56  | 809403                                     | 27                               | 77                                           |
| Marbled moray cod   | 77                    | 87  | 81  | 21                   | 18  | 20  | 879212                                     | 23                               | 63                                           |
| Roughhead grenadier | 80                    | 70  | 77  | 14                   | 8   | 12  | 906578                                     | 25                               | 53                                           |

**Table S2:** Estimated sequence identity using EMBOSS Needle (Rice *et al.* 2000) with default settings, between paralogous *Hbb* gene sequences from Baalsrud *et al.* 2017. Genes highlighted in bold are missing from the assemblies in figure 5.

| Species             | Genes compared                   | Sequence identity |
|---------------------|----------------------------------|-------------------|
| Silvery pout        | <i>Hbb2</i> – <i>Hbb3</i>        | 433/441 (98.2%)   |
| Roughhead grenadier | <i>Hbb2</i> – <i>Hbb3</i>        | 373/442 (84.4%)   |
| Cusk                | <i>Hbb1</i> – <b><i>Hbb2</i></b> | 316/470 (67.2%)   |
| Burbot              | <i>Hbb1</i> – <b><i>Hbb2</i></b> | 320/485 (66.0%)   |

**Table S3:** Amount of repeated sequences in the target regions of the Atlantic cod (Tørresen *et al.* 2017; gadMor2) and haddock (Tørresen *et al.* 2018; melAeg) given in percentage.

|                                                | MN           |         | LA           |         |
|------------------------------------------------|--------------|---------|--------------|---------|
|                                                | Atlantic cod | Haddock | Atlantic cod | Haddock |
| <b>Retro elements</b>                          | 1.0          | 4.11    | 2.8          | 3.98    |
| <b>Transposons</b>                             | 1.3          | 3.17    | 2.4          | 3.44    |
| <b>Simple repeats</b>                          | 5.8          | 7.8     | 13.8         | 12.02   |
| <b>Low complexity and unclassified repeats</b> | 2.6          | 1.48    | 1.3          | 1.38    |
| <b>Total repeated sequences</b>                | 10.7         | 16.31   | 20.3         | 19.98   |

**Table S4:** Amino acids at positions 55 and 62 in Hbb1 in various codfishes taken from Baalsrud *et al.* 2017.

| <b>Species</b>                     | <b>Pos 55</b> | <b>Pos 62</b> |
|------------------------------------|---------------|---------------|
| <i>Gadus morhua</i>                | V             | A             |
| <i>Arctogadus glacilis</i>         | M             | Q             |
| <i>Boreogadus saida</i>            | V             | N             |
| <i>Trisopterus minutus</i>         | M             | K             |
| <i>Pollachius virens</i>           | V             | K             |
| <i>Melanogrammus aeglefinus</i>    | V             | K             |
| <i>Merlangius merlangus</i>        | V             | R             |
| <i>Theragra chalcogramma</i>       | M             | K             |
| <i>Gadiculus argenteus</i>         | M             | Q             |
| <i>Phycis phycis</i>               | A             | Q             |
| <i>Molva molva</i>                 | M             | K             |
| <i>Lota lota</i>                   | L             | K             |
| <i>Brosme brosme</i>               | M             | K             |
| <i>Merluccius merluccius</i>       | M             | K             |
| <i>Merluccius capensis</i>         | M             | K             |
| <i>Merluccius polli</i>            | M             | K             |
| <i>Melanonus zugmayeri</i>         | M             | K             |
| <i>Macrourus berglax</i>           | L             | K             |
| <i>Malacocephalus occidentalis</i> | K             | Q             |
| <i>Bathygadus melanobranchus</i>   | Q             | K             |
| <i>Muraenolepis marmoratus</i>     | Q             | N             |
| <i>Bregmaceros cantori</i>         | M             | Q             |
| <i>Laemonema laureysi</i>          | M             | R             |
| <i>Thrachyrincus scabrus</i>       | K             | K             |



**Table S5:** Genes provided Nimblegen for the probe design and used to identify genes in *de novo* assemblies. For each gene, the gene name is given with its ENSEMBL name and ENSEMBL identifier.

| Gene name                 | ENSEMBL name | ENSEMBL Gene ID      |
|---------------------------|--------------|----------------------|
| <i>c17orf28</i>           | UBALD1B      | ENSGMOG00000015870   |
| <i>foxj1a</i>             | FOXJ1        | ENSGMOG00000015882   |
| <i>rhbdfb</i>             | RHBDF1       | ENSGMOG00000017919   |
| <i>aqp8</i>               | AQP8A        | ENSGMOG00000015825   |
| <i>aqp8</i>               | AQP8A        | ENSGMOG00000001220   |
| <i>lcmt</i>               | LCMT1        | ENSGMOG00000001230   |
| <i>arhgap17</i>           | ARHGAP8      | ENSGMOG00000001252   |
| <i>polr3k</i>             | polr3k       | ENSGMOG00000004334   |
| <i>mgrn1</i>              | mgrn1b       | ENSGMOG00000004288   |
| <i>aanat</i>              | aanat2       | ENSGMOG00000004277   |
| <i>rhbdf1a</i>            | rhbdf1b      | ENSGMOG00000004239   |
| <i>mpg</i>                | mpg          | ENSGMOG00000004225   |
| <i>nprl3</i>              | nprl3        | ENSGMOG00000004199   |
| <i>kank2</i>              | kank2        | ENSGMOG00000003897   |
| <i>dock6</i>              | dock6        | ENSGMOG00000003777   |
| <i>elavl3</i>             | elavl3       | ENSGMOG00000003760   |
| <i>prkcsh</i>             | prkcsh       | ENSGMOG00000003727   |
| <i>hbz</i>                | HBZ          | ENSGMOG00000017953   |
| <i>Hemoglobin beta 3</i>  |              | ENSGMOG00000020266   |
| <i>Hemoglobin alpha</i>   |              | ENSGMOG00000005709   |
| <i>Hemoglobin alpha1</i>  |              | ENSGMOP00000004430   |
| <i>Hemoglobin beta 2</i>  |              | ENSGMOP00000021753   |
| <i>Hemoglobin zeta</i>    |              | ENSGMOG00000017953.1 |
| <i>Hemoglobin alpha 3</i> |              | ENSGMOG00000003938.1 |
| <i>Hemoglobin</i>         |              | ENSGMOG00000020497   |
| <i>Hemoglobin beta 2</i>  |              | ENSGMOG00000020266   |
| <i>Hemoglobin beta 3</i>  |              | ENSGMOG00000015840.1 |
| <i>Hemoglobin beta</i>    |              | ENSGMOG00000015832   |
| <i>Hemoglobin beta5</i>   |              | ENSGMOG00000019722   |

**Table S6:** Each candidate region for probe design and number of bases for each of the selected codfish species

| <b>Species</b>                  | <b>Number of Regions</b> | <b>Number of Bases</b> |
|---------------------------------|--------------------------|------------------------|
| <i>Boreogadus saida</i>         | 47                       | 177632                 |
| <i>Gadiculus argenteus</i>      | 57                       | 208963                 |
| <i>Lota lota</i>                | 42                       | 284866                 |
| <i>Macrourus berglax</i>        | 26                       | 137930                 |
| <i>Melanogrammus aeglefinus</i> | 44                       | 184666                 |
| <i>Merluccius merluccius</i>    | 37                       | 193995                 |
| <i>Muraenolepis marmoratus</i>  | 50                       | 196574                 |
| <i>Theragra chalcogramma</i>    | 45                       | 201877                 |
| <i>Trachyrincus scabrurus</i>   | 38                       | 234180                 |
| <b>Grand Total</b>              | <b>386</b>               | <b>1820683</b>         |

**Table S7:** List of oligos for pre- and post – capture amplification and associated blocking oligos for hybridization capture used in this study.

| <b>Name</b>   | <b>Sequence (5'-3')</b>                   |
|---------------|-------------------------------------------|
| PreCap-2 fwd  | GTCAGACGATGCGTCATAATGATACGGCGACCACCGAGA   |
| PreCap-4 fwd  | GCTATACATGACTCTGCAATGATACGGCGACCACCGAGA   |
| PreCap-5 fwd  | GTACTAGAGTAGCACTCAATGATACGGCGACCACCGAGA   |
| PreCap-6 fwd  | GTGTGTATCAGTACATGAATGATACGGCGACCACCGAGA   |
| PreCap-7 fwd  | GACACGCATGACACACTAATGATACGGCGACCACCGAGA   |
| PreCap-12 fwd | GATGATGTGCTACATCTAATGATACGGCGACCACCGAGA   |
| PreCap-13 fwd | GCTGCGTGCTCTACGACAATGATACGGCGACCACCGAGA   |
| PreCap-14 fwd | GCGTCTATATACGTATAAATGATACGGCGACCACCGAGA   |
| PreCap-16 fwd | GCATCACTACGCTAGAAATGATACGGCGACCACCGAGA    |
| PreCap-2 rev  | CGCGATCTATGCACACGCAAGCAGAAGACGGCATAACGAG  |
| PreCap-4 rev  | CGACTCTGCGTCGAGTCCAAGCAGAAGACGGCATAACGAG  |
| PreCap-5 rev  | CTACAGCGACGTCATCGCAAGCAGAAGACGGCATAACGAG  |
| PreCap-6 rev  | CGCGCAGACTACGTGTGCAAGCAGAAGACGGCATAACGAG  |
| PreCap-7 rev  | CGTCTCTGCGATAACAGCCAAGCAGAAGACGGCATAACGAG |
| PreCap-12 rev | CACACTGACGTCGCGACCAAGCAGAAGACGGCATAACGAG  |
| PreCap-13 rev | CATAGAGACTCAGAGCTCAAGCAGAAGACGGCATAACGAG  |
| PreCap-14 rev | CCATAGCGACTATCGTGCAAGCAGAAGACGGCATAACGAG  |
| PreCap-16 rev | CTATGTGATCGTCTCTCCAAGCAGAAGACGGCATAACGAG  |
| Block-2 fwd   | GTCAGACGATGCGTCAT                         |
| Block-4 fwd   | GCTATACATGACTCTGC                         |
| Block-5 fwd   | GTACTAGAGTAGCACTC                         |
| Block-6 fwd   | GTGTGTATCAGTACATG                         |
| Block-7 fwd   | GACACGCATGACACACT                         |
| Block-12 fwd  | GATGATGTGCTACATCT                         |
| Block-13 fwd  | GCTGCGTGCTCTACGAC                         |
| Block-14 fwd  | GCGTCTATATACGTATA                         |
| Block-16 fwd  | GCATCACTACGCTAGA                          |
| Block-2 rev   | CGCGATCTATGCACACG                         |
| Block-4 rev   | CGACTCTGCGTCGAGTC                         |
| Block-5 rev   | CTACAGCGACGTCATCG                         |
| Block-6 rev   | CGCGCAGACTACGTGTG                         |
| Block-7 rev   | CGTCTCTGCGATAACAGC                        |
| Block-12 rev  | CACACTGACGTCGCGAC                         |
| Block-13 rev  | CATAGAGACTCAGAGCT                         |
| Block-14 rev  | CCATAGCGACTATCGTG                         |
| Block-16 rev  | CTATGTGATCGTCTCTC                         |
| PostCap-2 fwd | GTCAGACGATGCGTCATAATGA                    |
| PostCap-4 fwd | GCTATACATGACTCTGCAATGA                    |
| PostCap-5 fwd | GTACTAGAGTAGCACTCAATGA                    |
| PostCap-6 fwd | GTGTGTATCAGTACATGAATGA                    |
| PostCap-7 fwd | GACACGCATGACACACTAATGA                    |

PostCap-12 fwd GATGATGTGCTACATCTAATGA  
PostCap-13 fwd GCTGCGTGCTCTACGACAATGA  
PostCap-14 fwd GCGTCTATATACGTATAAATGA  
PostCap-16 fwd GCATCACTACGCTAGAAATGA  
PostCap-2 rev CGCGATCTATGCACACGCAAGC  
PostCap-4 rev CGACTCTGCGTCGAGTCCAAGC  
PostCap-5 rev CTACAGCGACGTCATCGCAAGC  
PostCap-6 rev CGCGCAGACTACGTGTGCAAGC  
PostCap-7 rev CGTCTCTGCGATACAGCCAAGC  
PostCap-12 rev CCACTGACGTCGCGACCAAGC  
PostCap-13 rev CATAGAGACTCAGAGCTCAAGC  
PostCap-14 rev CCATAGCGACTATCGTGCAAGC  
PostCap-16 rev CTATGTGATCGTCTCTCCAAGC

---

**Table S8:**

Information on all the fish samples used in this study. We used one individual of each species (N = 1). Distribution and Depths information taken from fishbase.org (Eschemeyer & Fricke 2017).

| Species                                                    | Year          | Location                                  | Tissue            | Depth                                                  | Distribution                                                                                                                                                                                                                                                                       |
|------------------------------------------------------------|---------------|-------------------------------------------|-------------------|--------------------------------------------------------|------------------------------------------------------------------------------------------------------------------------------------------------------------------------------------------------------------------------------------------------------------------------------------|
| <b>Atlantic cod</b><br><i>Gadus morhua</i>                 | 2009          | North East Atlantic Ocean                 | spleen            | Range 0 – 600m but usually found at 150 – 200m         | North Atlantic and Arctic oceans                                                                                                                                                                                                                                                   |
| <b>Haddock</b><br><i>Melanogrammus aeglefinus</i>          | 2009          | Lofoten, Norway                           | muscle/<br>spleen | 10 – 450m, usually found 10 – 200m                     | Northeast Atlantic: Bay of Biscay to Spitzbergen; in the Barents Sea to Novaya Zemlya; around Iceland; rare at the southern Greenland. Northwest Atlantic: Cape May, New Jersey to the Strait of Belle Isle.                                                                       |
| <b>Silvery pout</b><br><i>Gadiculus argenteus</i>          | 2009          | Inner Oslo Fjord, Norway                  | spleen            | 100 – 1000m                                            | Northeast Atlantic: found in the western Mediterranean and in the Atlantic around the Strait of Gibraltar and to the south along the Moroccan coast.                                                                                                                               |
| <b>Cusk</b><br><i>Brosme brosme</i>                        | 2011          | Lofoten, Norway                           | spleen            | 150 – 450m                                             | Northwest Atlantic: New Jersey to the Strait of Belle Isle and on the Grand Banks of Newfoundland. Rare at the southern tip of Greenland. Northeast Atlantic: off Iceland, in the northern North Sea, and along the coast of Scandinavia to the Murmansk Coast and at Spitzbergen. |
| <b>Burbot</b><br><i>Lota lota</i>                          | 2012          | Schwentine, Germany                       | spleen            | Lives at the bottoms of rivers and lakes at 0.5 – 230m | Holarctic in freshwater.                                                                                                                                                                                                                                                           |
| <b>European hake</b><br><i>Merluccius merluccius</i>       | 2009          | Inner Oslo Fjord, Norway                  | spleen            | 70 – 370m                                              | Atlantic coast of Europe and western North Africa; northward to Norway and Iceland, southward to Mauritania. Also found in the Mediterranean Sea and along the southern coast of the Black Sea.                                                                                    |
| <b>Marbled moray cod</b><br><i>Muraenolepis marmoratus</i> | 2006/<br>2007 | Elephant Isl. and the South Shetland Isl. | fin clip          | 30 – 1600m                                             | Southern Ocean: known only from the Crozet, Kerguelen and Heard islands.                                                                                                                                                                                                           |

---

**Roughhead  
grenadier  
*Macrourus  
berglax***

2011

North East  
Atlantic Ocean

fin clip

100 – 1000m,  
usually found  
at 300 –  
500m

North Atlantic Ocean

---

## Supplementary Figures

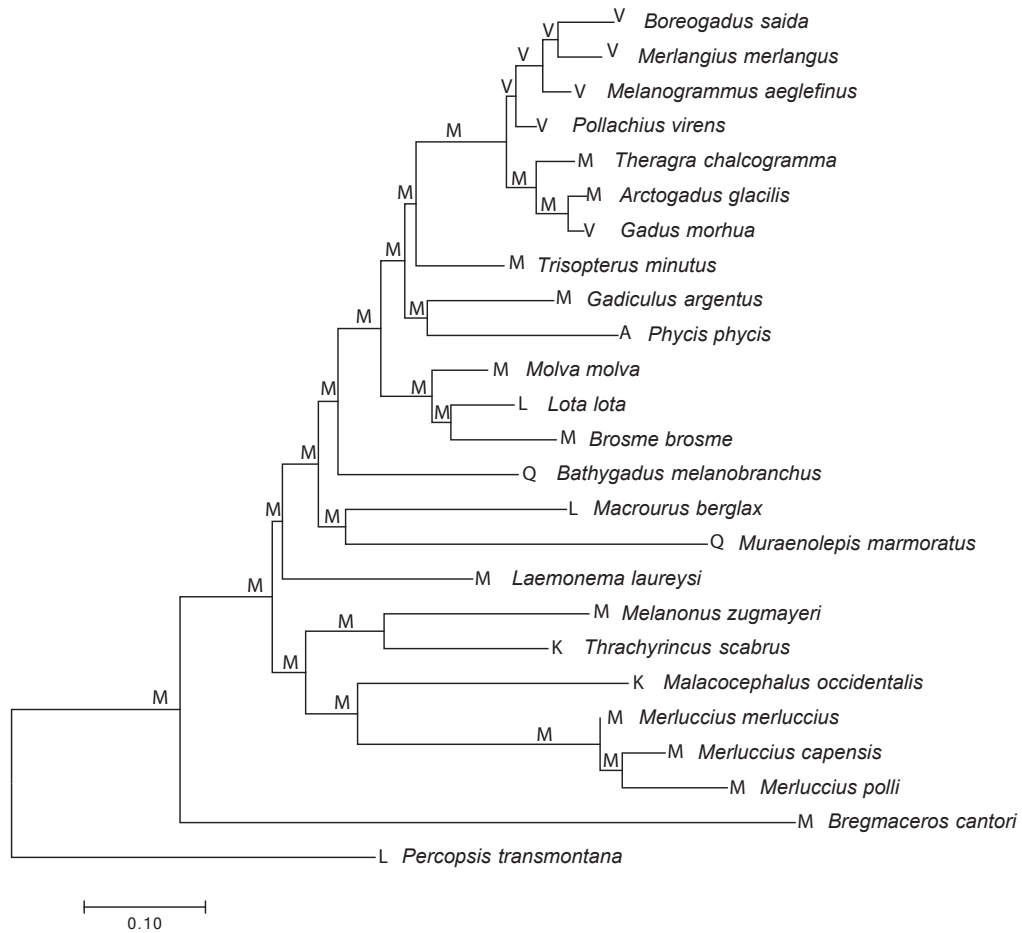

**Figure S1:** Ancestral reconstruction of amino acids at position 55 in the *Hbb-1* gene in Gadiformes. Phylogenetic trees and ancestral reconstruction were carried out in MEGA 7.0 (Kumar *et al.* 2016).

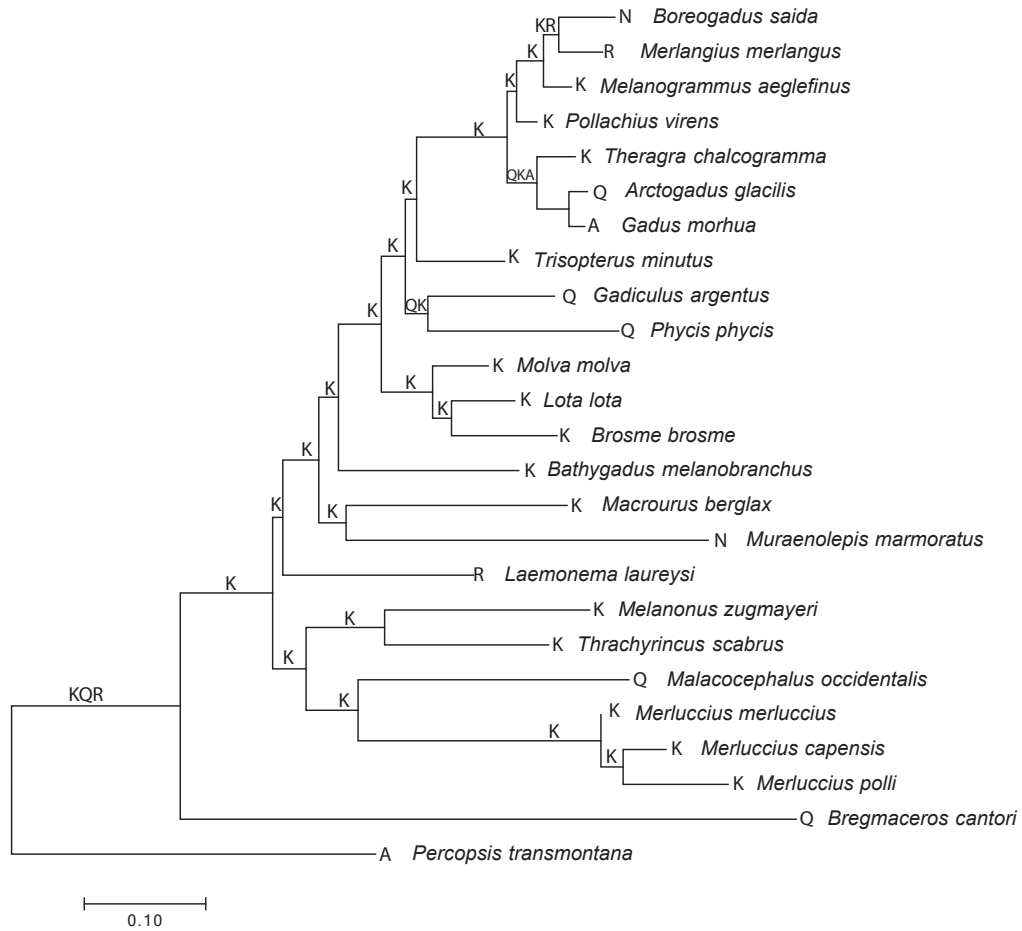

**Figure S2:** Ancestral reconstruction of amino acids at position 62 in the *Hbb-1* gene in Gadiformes. Phylogenetic trees and ancestral reconstruction were carried out in MEGA 7.0 (Kumar *et al.* 2016).



| Name            | 5' Sequence 3'                                   |
|-----------------|--------------------------------------------------|
| SeqCap Oligo1:  | AATGATACGGCGACCACCGAGA                           |
| PreCap-2 fwd:   | GTCAGACGATGCGTCATAAATGATACGGCGACCACCGAGA.....    |
| Block-2 fwd:    | GTCAGACGATGCGTCAT -----HE blocking from kit----- |
| PostCap-2 fwd:  | GTCAGACGATGCGTCATAATGA                           |
| PreCap-2 rev:   | CGCGATCTATGCACACGCAAGCAGAAGACGGCATAACGAG.....    |
| SeqCap Oligo2 : | CAAGCAGAAGACGGCATAACGAG                          |
| Block-2 rev:    | CGCGATCTATGCACACG -----HE blocking from kit----- |
| PostCap-2 rev:  | CGCGATCTATGCACACGCAAGC                           |

**Figure S3:** Example of the barcode and oligo design for the PacBio target enrichment assay used in this study. It involves adding unique PacBio barcodes (green) at each end of an Illumina compatible ligated and indexed library (yellow) by PCR.

Barcoded libraries are then pooled in equimolar concentrations before capture, with the use of blocking oligos (red, HE-blocking), followed by a final post capture amplification to boost library yield (blue).

## References

- Altschul, S. F., Gish, W., Miller, W., Myers, E. W., & Lipman, D. J. (1990). Basic local alignment search tool. *Journal of Molecular Biology*, 215(3), 403–410. [http://doi.org/https://doi.org/10.1016/S0022-2836\(05\)80360-2](http://doi.org/https://doi.org/10.1016/S0022-2836(05)80360-2)
- Baalsrud, H. T., Voje, K. L., Tørresen, O. K., Solbakken, M., Matschiner, M., Malmstrøm, M., ... Jentoft, S. (2017). Evolution of hemoglobin genes in codfishes influenced by ocean depth. *Scientific Reports*, 7, 1–10. <http://doi.org/10.1038/s41598-017-08286-2>
- Berlin, K., Koren, S., Chin, C.-S., Drake, J. P., Landolin, J. M., & Phillippy, A. M. (2015). Assembling large genomes with single-molecule sequencing and locality-sensitive hashing. *Nature Biotechnology*, 33(6), 623–630. <http://doi.org/10.1038/nbt.3238>
- English, A. C., Richards, S., Han, Y., Wang, M., Vee, V., Qu, J., ... Gibbs, R. A. (2012). Mind the gap: upgrading genomes with Pacific Biosciences RS long-read sequencing technology. *PLoS ONE*, 7(11), e47768–12. <http://doi.org/10.1371/journal.pone.0047768>
- Eschemeyer, W. N., & Fricke, R. (2017). Catalog of fishes. <http://researcharchive.calacademy.org/research/ichthyology/catalog/fishcatmain.asp>. (Last accessed September 2018).
- Kumar, S., Stecher, G., & Tamura, K. (2016). MEGA7: molecular evolutionary genetics analysis version 7.0 for bigger datasets. *Molecular Biology and Evolution*, 33(7), 1870–1874. <http://doi.org/10.1093/molbev/msw054>
- Li, H., & Durbin, R. (2009). Fast and accurate short read alignment with Burrows-Wheeler transform. *Bioinformatics*, 25(14), 1754–1760. <http://doi.org/10.1093/bioinformatics/btp324>
- Rice, P., Longden, I., & Bleasby, A. (2000). EMBOSS: The European molecular biology open software suite. *Trends in Genetics*, 16(6), 276–277. [http://doi.org/10.1016/S0168-9525\(00\)02024-2](http://doi.org/10.1016/S0168-9525(00)02024-2)
- Tørresen, O. K., Briec, M. S. O., Solbakken, M. H., Sørhus, E., Nederbragt, A. J., Jakobsen, K. S., ... Jentoft, S. (2018). Genomic architecture of haddock (*Melanogrammus aeglefinus*) shows expansions of innate immune genes and short tandem repeats. *BMC Genomics*, 19(1), 51. <http://doi.org/10.1186/s12864-018-4616-y>
- Tørresen, O. K., Star, B., Jentoft, S., Reinart, W. B., Grove, H., Miller, J. R., ... Nederbragt, A. J. (2017). An improved genome assembly uncovers prolific tandem repeats in Atlantic cod. *BMC Genomics*, 18(1), 95. <http://doi.org/10.1186/s12864-016-3448-x>
